# Supplementary material
Source: PubMed Central journal article supplement (PMC3781978)
Supplement: 3d6c7135745bc0aa21a89b8b32ddc5fa_genetics.113.153536-1.pdf [file 3d6c7135745bc0aa21a89b8b32ddc5fa_genetics.113.153536-1.pdf]

## File S1

### Cell size did not change throughout the transfers

To ensure that variation in cell size did not bias our estimates of the number of cell divisions between transfers, we measured the cell sizes of 4 MA lines at generations 0 and 1,000. Micrographs were taken of cells from each culture in late log-phase. Length ( $L$ ) and width ( $W$ ) of 100 cells per culture were measured using calibrated scale bars. To calculate the volume of a cell we assume that it is a prolate spheroid (Hellung-Larsen and Anderson 1989):  $V = \pi \cdot L \cdot W^2 / 6$ . Cell size did not change significantly between the beginning and end of the experiment in the 4 MA lines (Welch's two sample  $t$ -test on line means:  $t = 0.31$ ,  $df = 5.7$ ,  $P = 0.76$ ). We conclude that  $OD_{650}$  allows us to determine the number of generations elapsed between transfers throughout the course of MA.

### Literature Cited

Hellung-Larsen, P., and A. P. Anderson, 1989 Cell volume and dry weight of cultured *Tetrahymena*. *J. Cell. Sci.* **92**: 319–324.

## File S2

### MCMC analysis

**Prior specification:** For the fixed effects, we used independent normally distributed priors with a mean of 0 and a large variance of  $10^{10}$ . This is essentially uninformative between  $10^{-4}$  and  $10^4$ .

For the random effects, we used independent inverse Wishart (IW) distributed priors. The IW distribution has a probability density of zero for values up to zero, a large spike above zero and a long, flat tail for values above the spike. Reducing the value of either parameter of the IW distribution (the variance at the limit  $V$  and the degree of belief  $\nu$ ) causes the spike to move left, towards zero. Therefore, IW distributed priors are weakly informative for a variance component provided that its posterior distribution does not have high probability density at the spike. Since reducing  $V$  and  $\nu$  also causes model fitting to slow down, we searched for relatively high values of  $V$  and  $\nu$  that gave estimates that were not affected by the spike of the IW distribution. For the single and multiple GE data we chose  $V = 1$  and  $\nu = 0.002$ , and for the somatic fitness data we chose  $V = 0.1$  and  $\nu = 0.0002$ .

**Autocorrelation:** We began by running a Markov chain for  $1.5 \times 10^5$  iterations. We then analyzed the autocorrelation function between consecutive parameter values of the Markov chain at successive iterations for the last  $10^5$  iterations to determine how rapidly independence was achieved. For the single and multiple GE data we chose to sample every 50 iterations from the posterior distribution, and for the somatic fitness data we chose to sample every 200 iterations.

**Convergence:** We then ran three parallel Markov chains and used the method of Gelman and Rubin (1992) (implemented in R through the coda 0.14-4 package, Plummer et al. 2006) to determine how quickly convergence was achieved. For the single and multiple GE data convergence was achieved within  $\sim 10^5$  iterations, and for the somatic fitness data convergence was achieved within  $\sim 10^6$  iterations.

**Final MCMC analyses:** For the single and multiple GE data we allowed one Markov chain to run for a burn-in period of  $10^6$  iterations after which we ran  $10^7$  iterations and sampled from the posterior distribution every 50 iterations, resulting in  $2 \times 10^5$  stored values.

For the somatic fitness data we allowed one Markov chain to run for a burn-in period of  $4 \times 10^6$  iterations after which we ran  $4 \times 10^7$  iterations and sampled from the posterior distribution every 200 iterations, resulting in  $2 \times 10^5$  stored values.

### Literature Cited

Gelman, A., and D. B. Rubin, 1992 Inference from iterative simulation using multiple sequences. *Stat. Sci.* **7**: 457–511.  
Plummer, M., N. Best, K. Cowles and K. Vines, 2006 CODA: convergence diagnosis and output analysis for MCMC. *R News* **6**: 7–11.

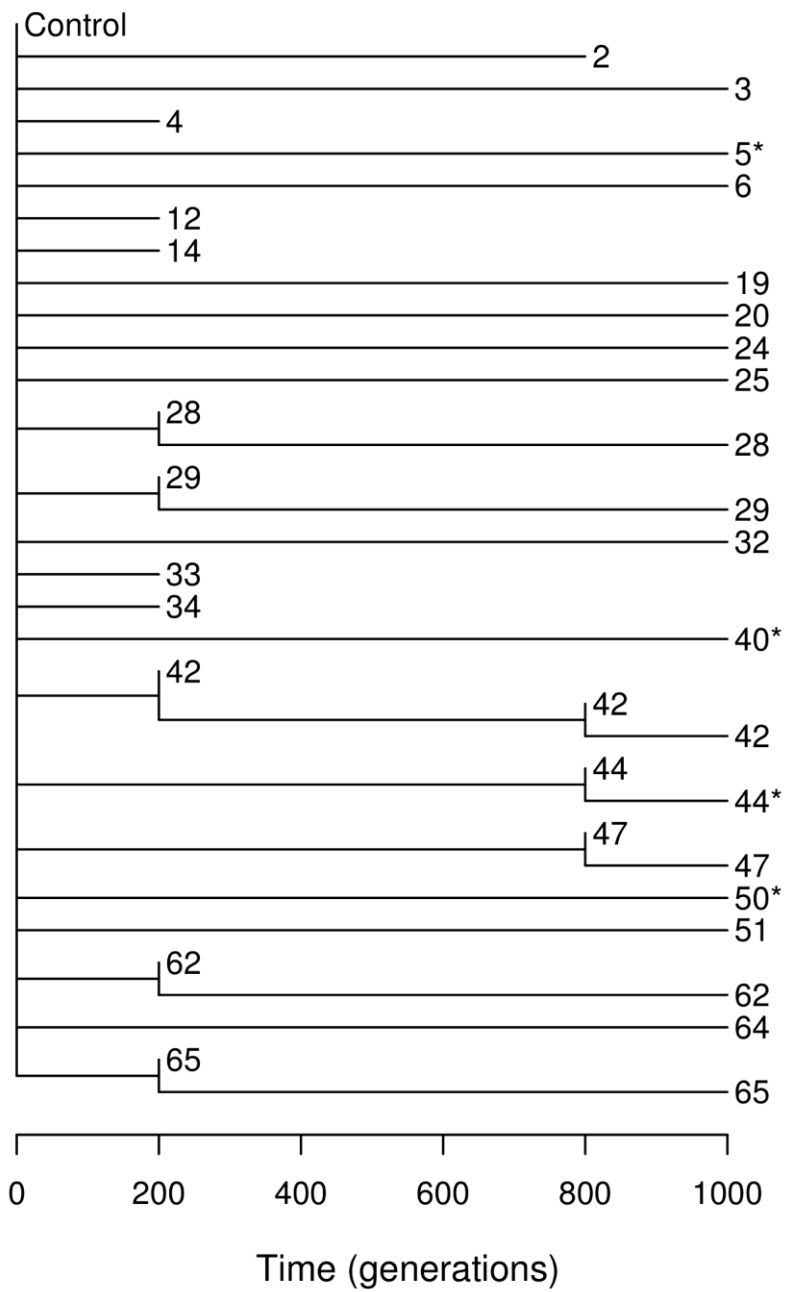

**Figure S1** Evolutionary history of the MA lines assayed for germline fitness. Lines marked with an asterisk were also assayed in the GE and BX experiments.
