# Supplementary material
Source: PubMed Central journal article supplement (PMC3781978)
Supplement: c530e29c1db008ed63e562b82656a129_genetics.113.153536-4.pdf [file c530e29c1db008ed63e562b82656a129_genetics.113.153536-4.pdf]

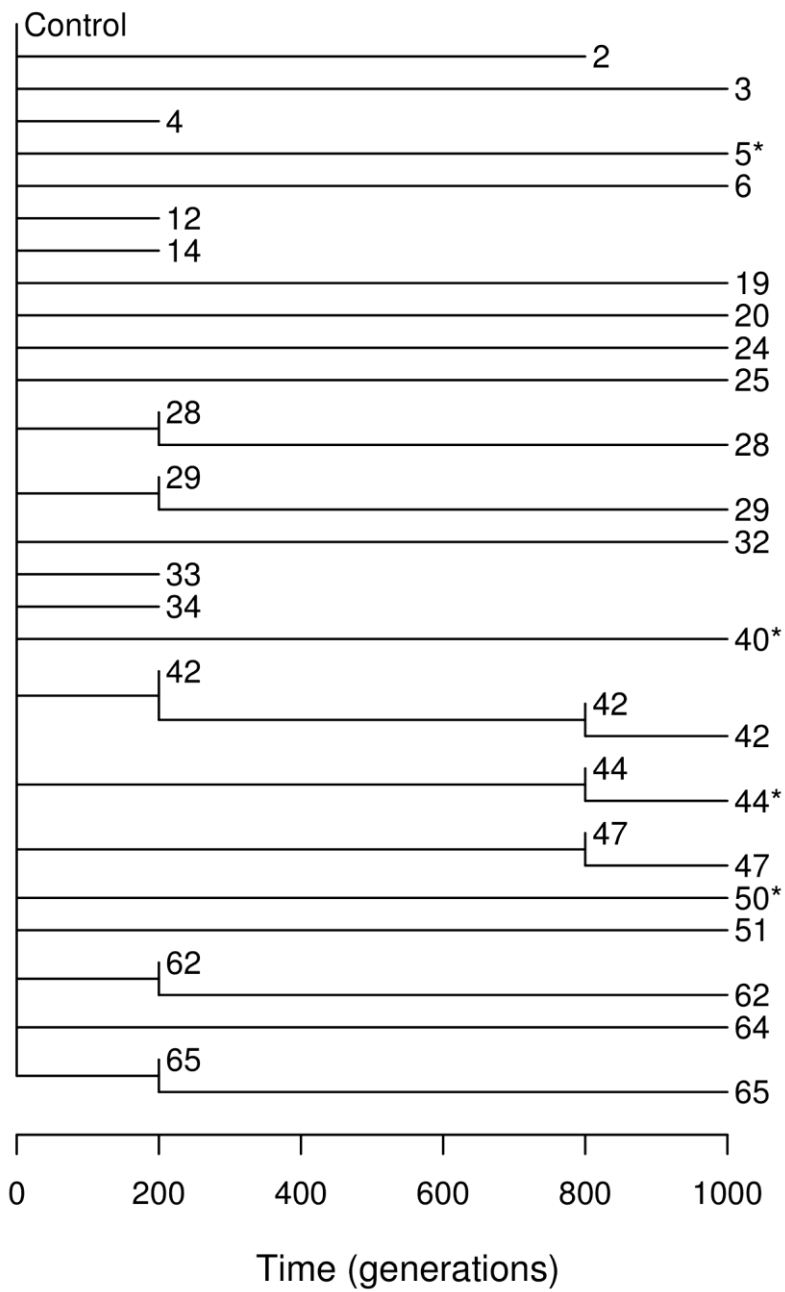

**Figure S1** Evolutionary history of the MA lines assayed for germline fitness. Lines marked with an asterisk were also assayed in the GE and BX experiments.
